# Supplementary material for: Gut microbiota mediates the anti-colitis effects of polysaccharides derived from Rhopilema esculentum Kishinouye in mice
Source: Royal Society of Chemistry journal article supplement (doi:10.1039/d2fo02712g), 2023-01-01
Supplement: d2fo02712g1.pdf [file d2fo02712g1.pdf]

## Supplementary Materials

### Gut microbiota mediates anti-colitis effects of polysaccharides derived from *Rhopilema esculentum* Kishinouye in mice

#### Supplementary Figures

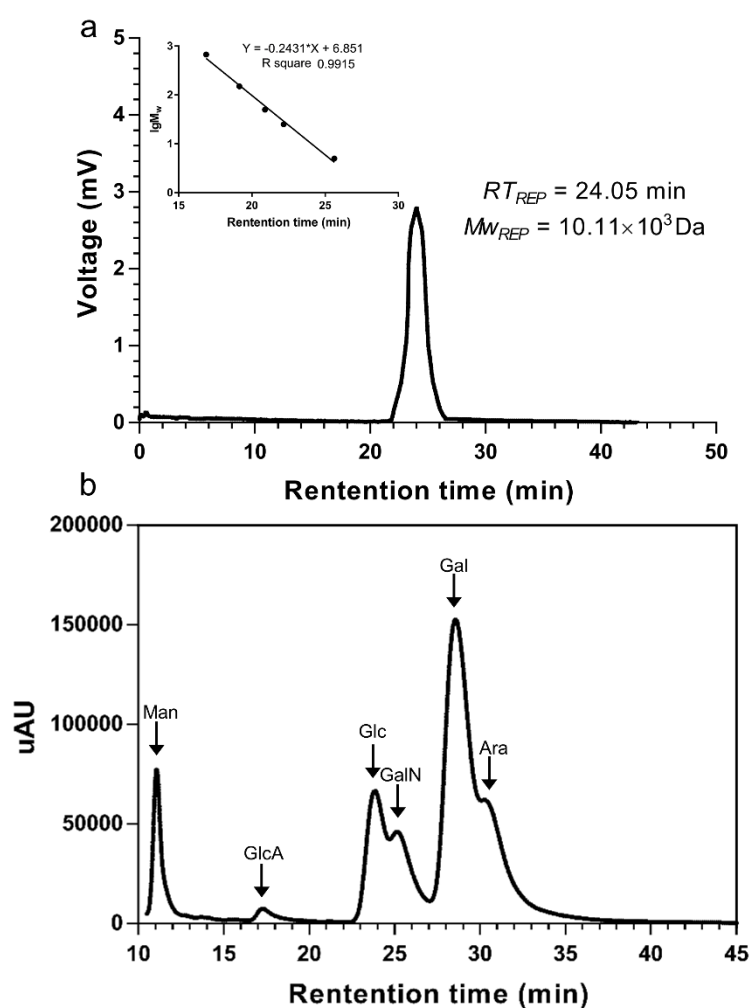

**Fig. S1.** The characterization results of *Rhopilema esculentum* polysaccharide (REP).  
(a) The HPGPC profile of molecular weight of REP. (b) HPLC-MS chromatograms for monosaccharide composition analysis of REP.

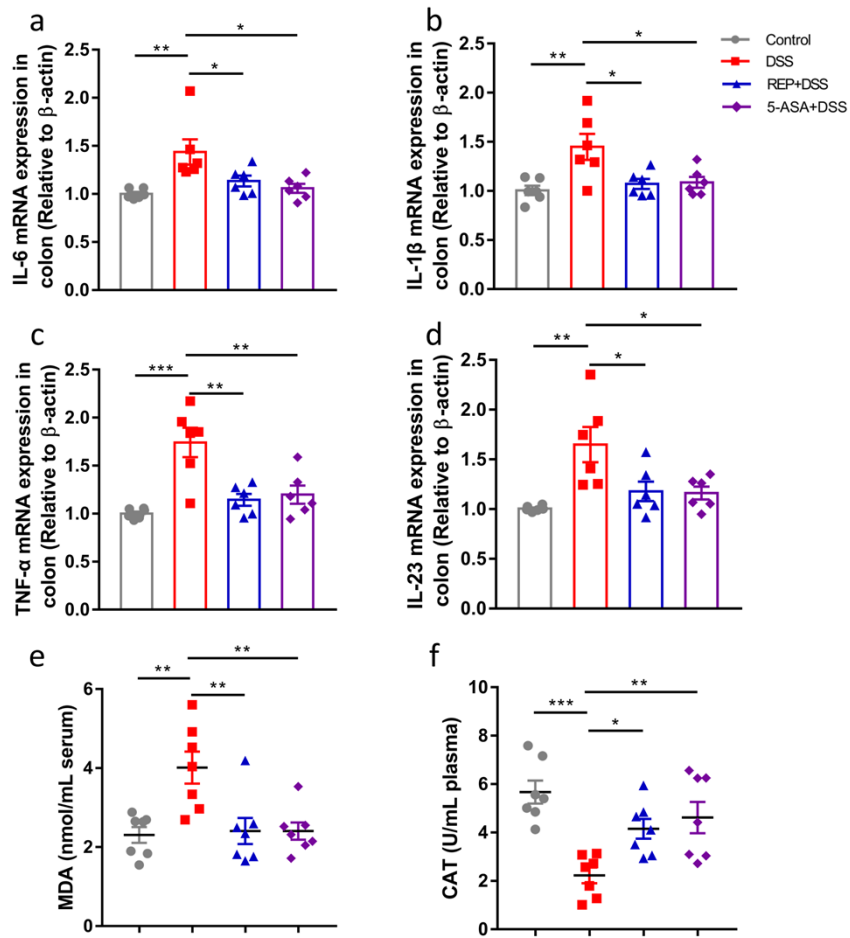

**Fig. S2. REP modulated inflammatory cytokines in colonic tissues and regulated oxidative stress in serum and plasma.** Relative mRNA expression of (a) IL-6, (b) IL-1 $\beta$ , (c) TNF- $\alpha$ , (d) IL-23 in the colonic tissue (n=6). Concentration of MDA (e) in serum and CAT (f) in the plasma (n=7).

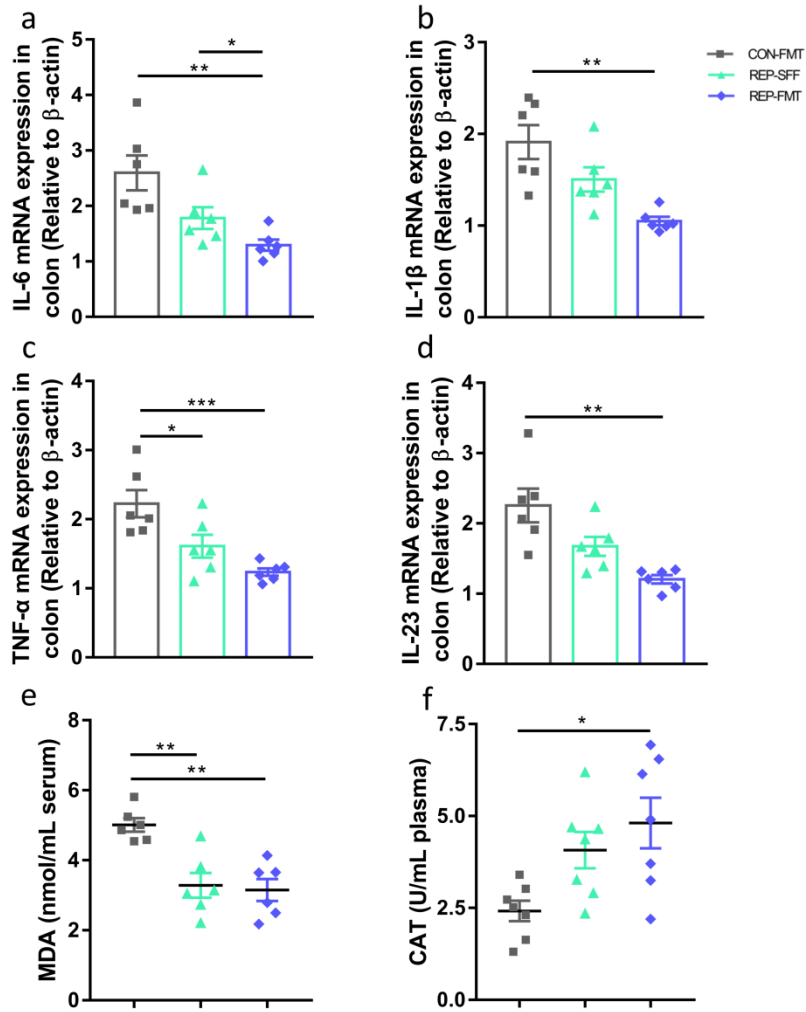

**Fig. S3. REP-FMT contributed more to modulate inflammatory cytokines in colonic tissues and oxidative stress in serum and plasma.** Relative mRNA expression of (a) IL-6, (b) IL-1 $\beta$ , (c) TNF- $\alpha$ , (d) IL-23 in the colonic tissue (n=6). Concentration of MDA (e) in serum and CAT (f) in the plasma (n=6).

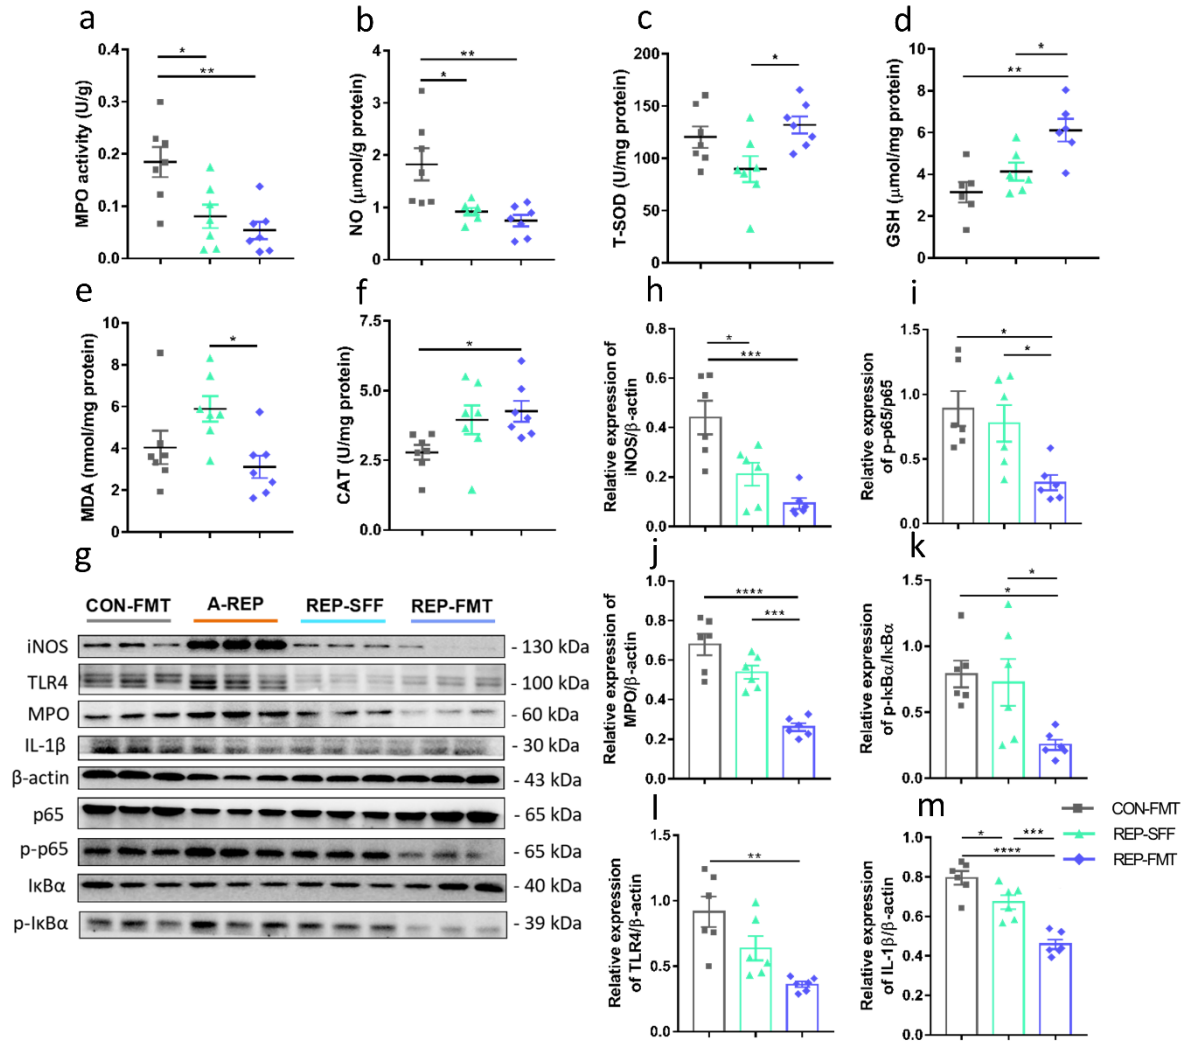

**Fig. S4. REP-FMT attenuated the oxidative stress and regulated inflammatory responses compared to CON-FMT and REP-SFF.** Concentrations of MPO activity (a), NO (b), T-SOD (c), GSH (d), MDA (e) and CAT (f) in the colon (n=6-7). (g) Western blot images of iNOS, p65, p-p65, TLR4, MPO, IL-1 $\beta$ ,  $\beta$ -actin, I $\kappa$ B- $\alpha$  and p-I $\kappa$ B- $\alpha$ . The relative expression of respective protein (h-m) was quantified via Image J software (n=6). Results were presented as mean $\pm$  SEM. \* p < 0.05, \*\* p < 0.01, \*\*\* p < 0.001, \*\*\*\* p < 0.0001.

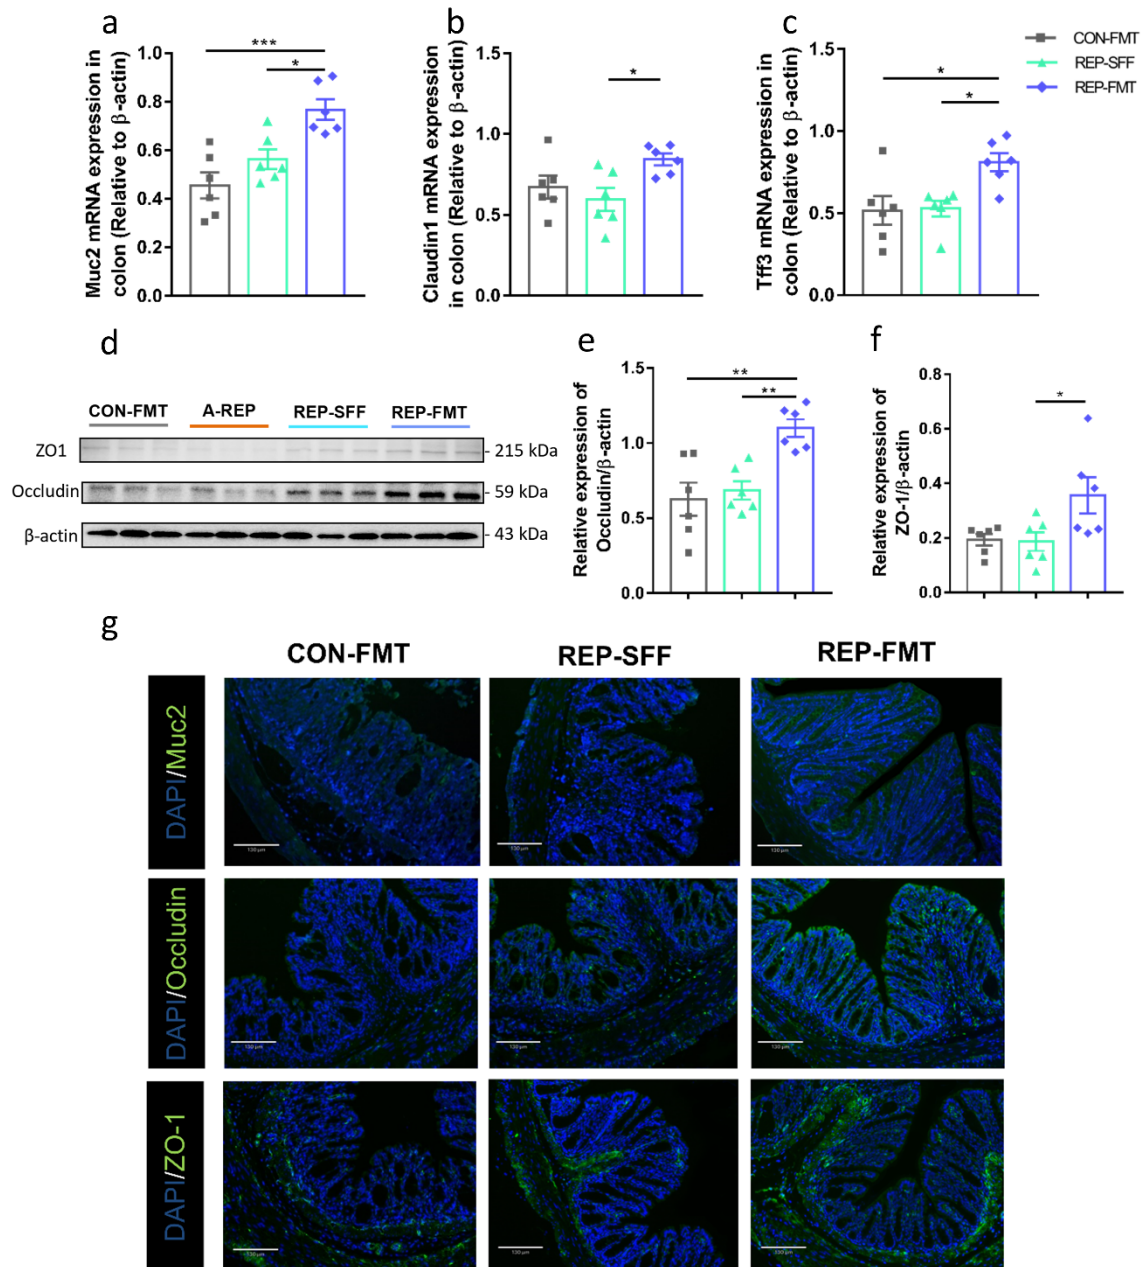

**Fig. S5. REP-FMT improved colonic epithelial integrity and mucosal barrier function compared to CON-FMT and REP-SFF.** Relative mRNA expression of Muc2, Claudin1 and Tff3 (a-c) in the colonic tissue (n=6). (d) Expression of ZO-1 and Occludin in the colon was measured by western blot, and the relative intensity of ZO-1 (e) and Occludin (f) proteins was analyzed by Image J software (n=6). (g) Immunofluorescence image of expression of Muc2 and Tjs. Magnification:  $\times 100$ . Results were displayed as mean  $\pm$  SEM. \*  $p < 0.05$ , \*\*  $p < 0.01$ , \*\*\*  $p < 0.001$ , \*\*\*\*  $p < 0.0001$ .

## Supplementary Tables

**Table S1: List of ELISA kits**

| ELISA kits    | Catalog Number | Manufacturer           |
|---------------|----------------|------------------------|
| IL-6          | ml002293-C     |                        |
| IL-1 $\beta$  | ml063132-C     |                        |
| TNF- $\alpha$ | ml002095-C     | Shanghai Enzyme-linked |
| IL-8          | ml028580       | Biotechnology Co., Ltd |
| IL-23         | ml001919       |                        |
| IFN- $\gamma$ | ml002277       |                        |
| LPS           | ml037221-J     |                        |

**Table S2: Primer sequences used for RT-PCR experiments**

| Genes          | Gene ID | Forward primer           | Reverse primer          |
|----------------|---------|--------------------------|-------------------------|
| $\beta$ -actin | 11461   | CCTGAACCCCTAAGGCCAACC    | CGGAGTCCATCACAATGCCT    |
| IL-6           | 16193   | CTCAGCGCTGAGTTG          | CCTGTAGCCCACGTCGTAGC    |
| TNF- $\alpha$  | 21926   | ACTGAACTTCGGGGTGATCG     | GGCTACAGGCTTGTCACCTCG   |
| IL-1 $\beta$   | 16176   | GAGCACCTTCTTTTCCTTCATCTT | TCACACACCAGCAGGTTATCATC |
| IL-23R         | 209590  | ACTATGCCATCAAAGTCAAGGT   | CCAAGAGTTCAGCCATCCTC    |
| Occludin       | 18260   | GGCAAGCGATCATAACCAGAG    | AGGCTGCCTGAAGTCATCCAC   |
| ZO-1           | 21872   | GACCAATAGCTGATGTTGCCAGAG | TATGAAGGCGAATGATGCCAGA  |
| Muc2           | 17831   | TCATGACGTCTGGTGAATGG     | AGCTTGTCGTGGCAGCTTGA    |
| E-cadherin     | 12550   | GCCAATCCTGATGAAATTGGAAAC | CCACTGCCCTCGTAATCGAAC   |
| Tff3           | 21786   | TGCTGCCATGGAGACCAGAG     | GACATTTGCCGGCACCATAC    |

**Table S3: List of antibodies**

| <b>Name of Antibody</b>           | <b>Catalog number</b> | <b>Concentration</b>    | <b>Company</b>            |
|-----------------------------------|-----------------------|-------------------------|---------------------------|
| <b>NF-κB/p65</b>                  | #8242                 | 1:1000                  | Cell Signaling Technology |
| <b>p-NF-κB/p65</b>                | #3033                 | 1:1000                  | Cell Signaling Technology |
| <b>IkBα</b>                       | #4814                 | 1:1000                  | Cell Signaling Technology |
| <b>p-IkBα</b>                     | #2859                 | 1:1000                  | Cell Signaling Technology |
| <b>iNOS</b>                       | A3774                 | 1:1000                  | ABclonal Technology       |
| <b>MPO</b>                        | A1374                 | 1:1000                  | ABclonal Technology       |
| <b>TLR4</b>                       | A5258                 | 1:1000                  | ABclonal Technology       |
| <b>IL-1β</b>                      | A16288                | 1:1000                  | ABclonal Technology       |
| <b>β-actin</b>                    | 4970                  | WB: 1:1000              | Cell Signaling Technology |
| <b>Occludin</b>                   | 27260-1-AP            | IF: 1:300<br>WB: 1:1000 | Proteintech Group         |
| <b>ZO-1</b>                       | A0659                 | WB: 1:500               | ABclonal Technology       |
| <b>Muc2</b>                       | 27675-1-AP            | IF: 1:1000              | Proteintech Group         |
| <b>ZO-1</b>                       | Ab221547              | IF: 1:100               | Abcam plc                 |
| <b>Goat Anti-Rabbit IgG</b>       | Ab150077              | IF: 1:400               | Abcam plc                 |
| <b>H&amp;L (Alexa Fluor® 488)</b> |                       |                         |                           |
